# Supplementary material
Source: publisher site journal article supplement (https://www.dovepress.com/article/452386)
Supplement: Supplementary file 1 [file get_supplementary_file.php]

## Supplemental table

**Table S1:** Characteristics of Patients Who Completed and Those Who Did Not Complete the SGRQ<sup>a</sup>

| Characteristics                                   | All patients<br>(N = 3574) | Patients completing<br>the SGRQ<br>(n = 2407) | Patients not<br>completing<br>the SGRQ<br>(n = 1167) |
|---------------------------------------------------|----------------------------|-----------------------------------------------|------------------------------------------------------|
| Age at enrollment, years                          |                            |                                               |                                                      |
| Mean (SD)                                         | 54.4 (14.7)                | 54.0 (14.4)                                   | 55.3 (15.4)                                          |
| Median (range)                                    | 56 (18–94)                 | 56 (18–92)                                    | 57 (18–94)                                           |
| Female, %                                         | 68.7                       | 70.1                                          | 65.8                                                 |
| Body mass index (kg/m <sup>2</sup> ), mean (SD)   | 33.2 (8.9)                 | 33.2 (9.0)                                    | 33.1 (8.6)                                           |
| Race, %                                           |                            |                                               |                                                      |
| White                                             | 73.5                       | 77.5                                          | 65.1                                                 |
| Black                                             | 17.6                       | 14.9                                          | 23.1                                                 |
| Asian                                             | 1.8                        | 1.6                                           | 2.1                                                  |
| Other <sup>b</sup>                                | 3.2                        | 3.4                                           | 2.7                                                  |
| Not reported                                      | 3.9                        | 2.5                                           | 6.6                                                  |
| Missing                                           | 0.1                        | 0.0                                           | 0.4                                                  |
| Hispanic or Latino ethnicity, %                   | 10.0                       | 9.1                                           | 12.1                                                 |
| Residential area                                  |                            |                                               |                                                      |
| Urban                                             | 26.6                       | 25.3                                          | 29.0                                                 |
| Rural                                             | 22.9                       | 23.4                                          | 21.9                                                 |
| Suburban                                          | 47.3                       | 48.4                                          | 45.0                                                 |
| Missing                                           | 3.0                        | 2.8                                           | 3.4                                                  |
| Insurance, %                                      |                            |                                               |                                                      |
| Commercial                                        | 57.4                       | 60.3                                          | 51.4                                                 |
| Medicaid                                          | 11.2                       | 10.1                                          | 13.4                                                 |
| Medicare                                          | 23.5                       | 21.6                                          | 27.4                                                 |
| Uninsured                                         | 1.0                        | 1.0                                           | 0.9                                                  |
| Other <sup>c</sup>                                | 6.9                        | 6.9                                           | 6.7                                                  |
| Missing                                           | 0.1                        | 0.0                                           | 0.2                                                  |
| Employment status, %                              |                            |                                               |                                                      |
| Employed (full-time, part-time, or self-employed) | 47.3                       | 49.6                                          | 42.4                                                 |
| Homemaker                                         | 3.2                        | 3.2                                           | 3.2                                                  |
| Full-time student                                 | 1.9                        | 2.0                                           | 1.8                                                  |
| Retired                                           | 24.7                       | 24.1                                          | 25.9                                                 |
| Disabled due to asthma                            | 6.5                        | 6.9                                           | 5.9                                                  |
| Disabled due to non-asthma condition              | 6.2                        | 5.2                                           | 8.1                                                  |
| Unemployed                                        | 6.5                        | 6.2                                           | 7.2                                                  |
| Missing                                           | 3.4                        | 2.7                                           | 4.8                                                  |
| Subspecialist care, %                             |                            |                                               |                                                      |
| Allergist/immunologist                            | 38.1                       | 40.2                                          | 33.9                                                 |
| Pulmonologist                                     | 53.2                       | 50.4                                          | 59.1                                                 |

|                                                       |      |      |      |
|-------------------------------------------------------|------|------|------|
| Allergist/immunologist and pulmonologist              | 8.6  | 9.4  | 6.9  |
| Screening/enrollment treatment class <sup>b</sup> , % |      |      |      |
| Uncontrolled on high-dose ICS/LABA only               | 30.2 | 27.8 | 35.3 |
| Any monoclonal antibody                               | 65.3 | 68.2 | 59.4 |
| omalizumab                                            | 27.8 | 30.2 | 23   |
| non-omalizumab                                        | 36.6 | 37.7 | 34.3 |
| Systemic corticosteroids or immunosuppressant only    | 11.5 | 11.3 | 12.1 |

<sup>a</sup>Percentages may not sum to 100% due to rounding.

<sup>b</sup>Includes Asian, American Indian or Alaska Native, Native Hawaiian or Other Pacific Islander, and Other.

<sup>c</sup>Other insurance including other government insurance.

Abbreviations: ICS, inhaled corticosteroids; LABA, long-acting beta agonists; PRO, patient-reported outcome; SD, standard deviation; SGRQ, St. George's Respiratory Questionnaire.
